# Supplementary material for: Improved biological phosphorus removal induced by an oxic/extended-idle process using glycerol and acetate at equal fractions
Source: Royal Society of Chemistry journal article supplement (doi:10.1039/c6ra18799d), 2016-01-01
Supplement: c6ra18799d1.pdf [file c6ra18799d1.pdf]

## **Improved Biological Phosphorus Removal Induced by Oxidic/Extended-Idle Process Using Glycerol and Acetate at Equal Fraction**

Jianwei Zhao <sup>a,b</sup>, Dongbo Wang <sup>a,b\*</sup>, Xiaoming Li <sup>a,b</sup>, Guangming Zeng<sup>a,b</sup>, Qi Yang <sup>a,b\*</sup>

<sup>a</sup> College of Environmental Science and Engineering, Hunan University, Changsha 410082, China

<sup>b</sup> Key Laboratory of Environmental Biology and Pollution Control, Hunan University, Ministry of Education, Changsha 410082, China

The first author: Jianwei Zhao E-mail: zhaojianwei1213@yahoo.com

Corresponding author

Tel: +86 731 88823967; fax: +86 731 88822829;

E-mail: w.dongbo@yahoo.com (D. WANG), yangqi@hnu.edu.cn (Q. YANG).

Journal: RSC Advance

The Number of Pages: 4

The Number of Figures: 1

The Number of Tables: 1

---

\* Corresponding author at: College of Environmental Science and Engineering, Hunan University, Changsha 410082, China. Tel.: +86 731 88823967; fax: +86 731 88822829.

E-mail addresses: w.dongbo@yahoo.com (D. Wang), yangqi@hnu.edu.cn (Q. YANG).

## Materials and Methods

Table S1. Oligonucleotide probes used in this study

| Probe      | Sequence5'-3'                      | Specificity                                 | Reference              |
|------------|------------------------------------|---------------------------------------------|------------------------|
| PAO462     | CCG TCA TCT ACW CAG GGT<br>ATT AAC | Most <i>Accumulibacter</i>                  | Crocetti et al. (2000) |
| PAO651     | CCC TCT GCC AAA CTC CAG            | Most <i>Accumulibacter</i>                  | Crocetti et al. (2000) |
| PAO846     | GTT AGC TAC GGC ACT AAA<br>AGG     | Most <i>Accumulibacter</i>                  | Crocetti et al. (2000) |
| EUB338-I   | GCT GCC TCC CGT AGG AGT            | Most bacteria                               | Amann et al. (1995)    |
| EUB338-II  | GCA GCC ACC CGT AGG TGT            | <i>Planctomycetales</i>                     | Daims et al. (1999)    |
| EUB338-III | GCT GCC ACC CGT AGG TGT            | <i>Verrucomicrobiales</i>                   | Daims et al. (1999)    |
| GAOQ431    | TCC CCG CCT AAA GGG CTT            | Some <i>Competibacter</i>                   | Crocetti et al. (2002) |
| GAOQ989    | TTC CCC GGA TGT CAA GGC            | Some <i>Competibacter</i>                   | Crocetti et al. (2002) |
| GB_G2      | TTCCCCAGATGTCAAGGC                 | Some <i>Competibacter</i>                   | Kong et al. (2002)     |
| TFO-DF218  | GAA GCC TTT GCC CCT CAG            | ' <i>Defluviicoccus</i> '-related organisms | Wong et al. (2004)     |
| TFO-DF618  | GCC TCA CTT GTC TAA CCG            | ' <i>Defluviicoccus</i> '-related organisms | Wong et al. (2004)     |
| DF988      | GAT ACG ACG CCC ATG TCA<br>AGG G   | ' <i>Defluviicoccus</i> '-related organisms | Meyer et al. (2006)    |
| DF1020     | CCG GCC GAA CCG ACT CCC            | ' <i>Defluviicoccus</i> '-related organisms | Meyer et al. (2006)    |

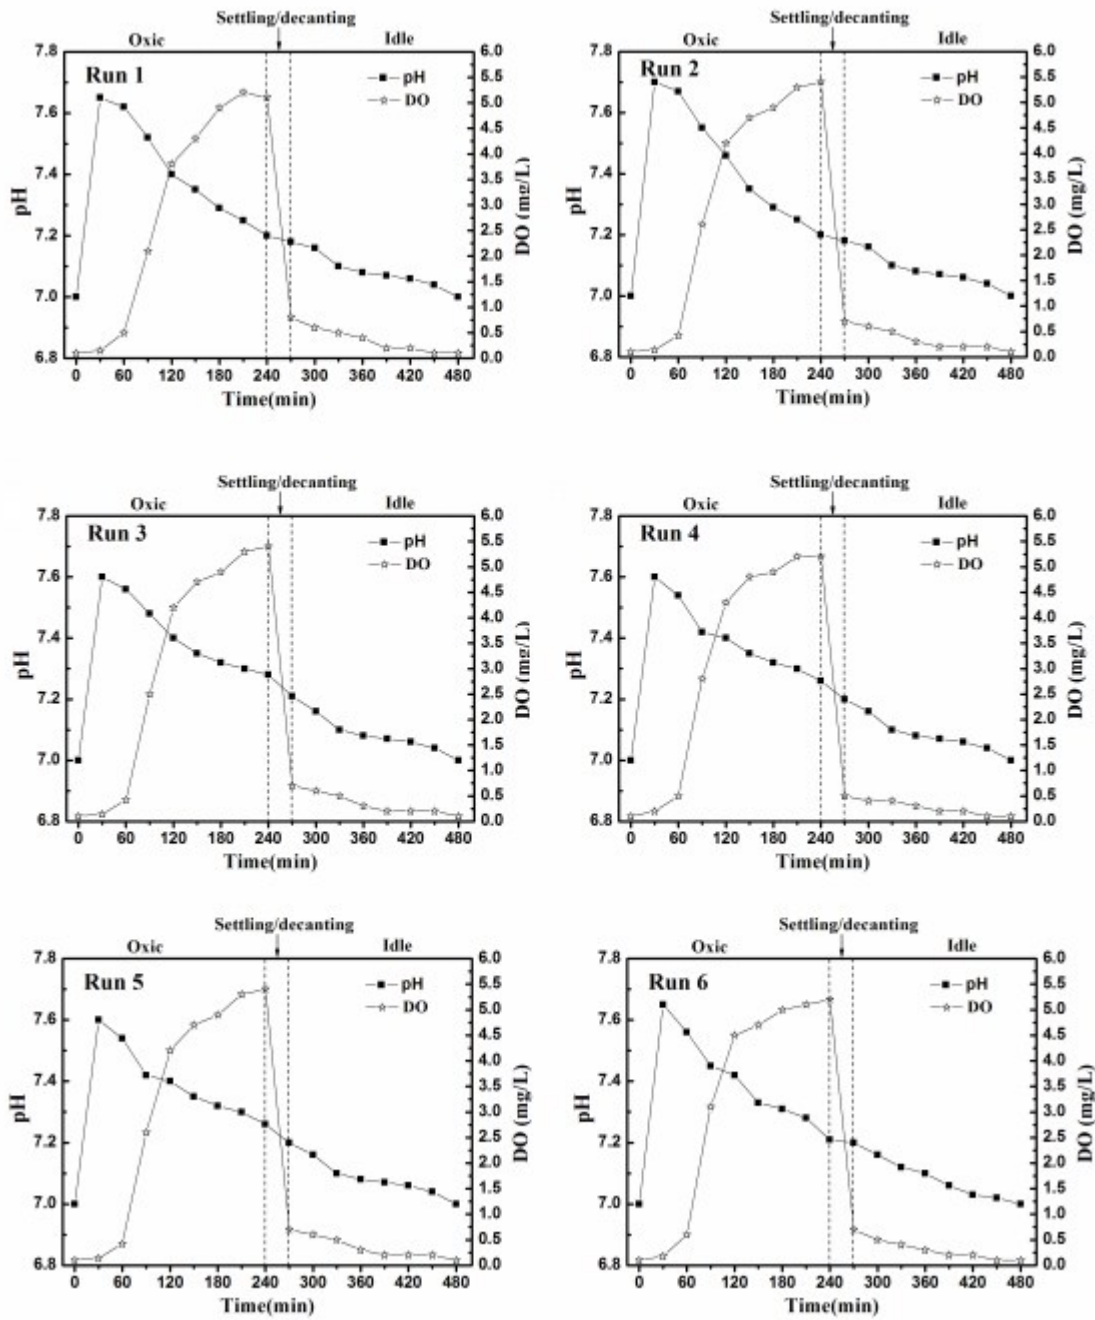

Figure S1. Profiles of pH and DO variations during a typical cycle of each Run in the O/EI reactor.

## Supplementary Reference

- Amann, R., Ludwig, W., Schleifer, K.H., 1995. Phylogenetic identification and in situ detection of individual microbial cells without cultivation. *Microbiol. Rev.* 59 (1): 143-169.
- Crocetti, G.R., Hugenholtz, P., Bond, P.L., Schuler, A., Keller, J., Jenkins, D., Blackall, L.L., 2000. Identification of polyphosphate-accumulating organisms and design of 16S rRNA-directed probes for their detection and quantitation. *Appl. Environ. Microbiol.* 66 (3): 1175-1182.
- Crocetti, G.R., Banfield, J.F., Keller, J., Bond, P.L., Blackall, L.L., 2002. Glycogen-accumulating organisms in laboratory-scale and full-scale wastewater treatment processes. *Microbiol.* 148 (Pt 11): 3353-3364.
- Daims, H., Bruhl, A., Amann, R., Schleifer, K.H., Wagner, M., 1999. The domain-specific probe EUB338 is insufficient for the detection of all bacteria: development and evaluation of a more comprehensive probe set. *Syst. Appl. Microbiol.* 22 (3): 434-444.
- Kong, Y.H., Say, Ong, S.L., Ng, W.J., Liu, W.T., 2002. Diversity and distribution of a deeply branched novel proteobacterial group found in anaerobic-aerobic activated sludge processes. *Environ. Microbiol.* 4 (11): 753-757.
- Meyer, R.L., Saunders, A.M., Blackall, L.L., 2006. Putative glycogen-accumulating organisms belonging to the *Alphaproteobacteria* identified through rRNA-based stable isotope probing. *Microbiol.* 152 (Pt 2): 419-429.
- Wong, M.T., Tan, F.M., Ng, W.J., Liu, W.T., 2004. Identification and occurrence of tetrad-forming *Alphaproteobacteria* in anaerobic-aerobic activated sludge processes. *Microbiol.* 150 (Pt 11): 3741-3748.
